# Supplementary material for: Analysis and Research on Starch Content and Its Processing, Structure and Quality of 12 Adzuki Bean Varieties
Source: MDPI journal article supplement (doi:10.3390/foods11213381), 2022-10-27
Supplement: s1 [file s1]

Table S1. Properties of starch in different adzuki bean varieties.

| Physical and chemical properties | Class I      | Class II     | Class III   |
|----------------------------------|--------------|--------------|-------------|
| Solubility/%                     | 10.09±0.01   | 9.64±0.03    | 9.85±0.02   |
| Swelling power/%                 | 13.72±2.18   | 14.21±1.67   | 12.75±0.95  |
| Freezing-thawing stability/%     | 49.18±3.22   | 53.63±0.24   | 49.09±3.28  |
| Amylose/%                        | 13.12±2.37   | 21.51±9.21   | 10.29±4.54  |
| Amylopectin/%                    | 86.88±2.37   | 78.49±9.21   | 89.71±4.54  |
| AM/AP ratio                      | 15.18±3.22   | 28.36±15.11  | 11.77±5.75  |
| Bean paste rate/%                | 53.35±0.08   | 47.17±0.03   | 56.74±0.09  |
| Starch granule size              | 40.05±4.82   | 41.38±1.78   | 38.79±0.47  |
| Hardness/N                       | 137.97±12.52 | 204.43±43.35 | 55.08±21.03 |
| Cohesion ratio                   | 0.13±0.04    | 0.17±0.03    | 0.11±0.03   |
| Elasticity/mm                    | 1.93±0.58    | 2.22±0.48    | 0.88±0.45   |
| Adhesiveness/N                   | 19.10±6.43   | 36.90±4.01   | 6.38±2.68   |
| Chewiness/ mJ                    | 40.64±23.07  | 84.88±5.79   | 7.00±5.85   |
| Whiteness                        | 129.85±7.69  | 137.60±3.63  | 132.50±3.59 |
| RDS/%                            | 57.41±4.79   | 47.73±1.95   | 53.81±5.13  |
| SDS/%                            | 25.36±7.82   | 38.04±5.07   | 28.84±1.79  |
| RS/%                             | 7.23±4.76    | 4.23±3.12    | 7.35±3.96   |
| To/°C                            | 60.95±3.43   | 70.43±5.06   | 58.49±4.35  |
| Tp/°C                            | 70.27±0.86   | 75.49±4.11   | 75.36±2.91  |
| Tc/°C                            | 83.05±1.06   | 87.93±6.75   | 88.21±3.30  |
| Δ H/J/g                          | 3.75±1.01    | 3.40±1.52    | 2.71±0.12   |
| Crystallinity/%                  | 76.66±0.63   | 81.71±5.43   | 81.78±3.10  |
